# Supplementary material for: Loss of p16Ink4a Function Rescues Cellular Senescence Induced by Telomere Dysfunction
Source: Int J Mol Sci. 2012 May 16;13(5):5866–77. doi: 10.3390/ijms13055866 (PMC3382785; doi:10.3390/ijms13055866)

# Supplementary Information

**Figure S1.** The quantification of Figure 2A and B. The blots were quantified based on their loading control tubulin or actin. The density of blots for WT cells were set as 1.

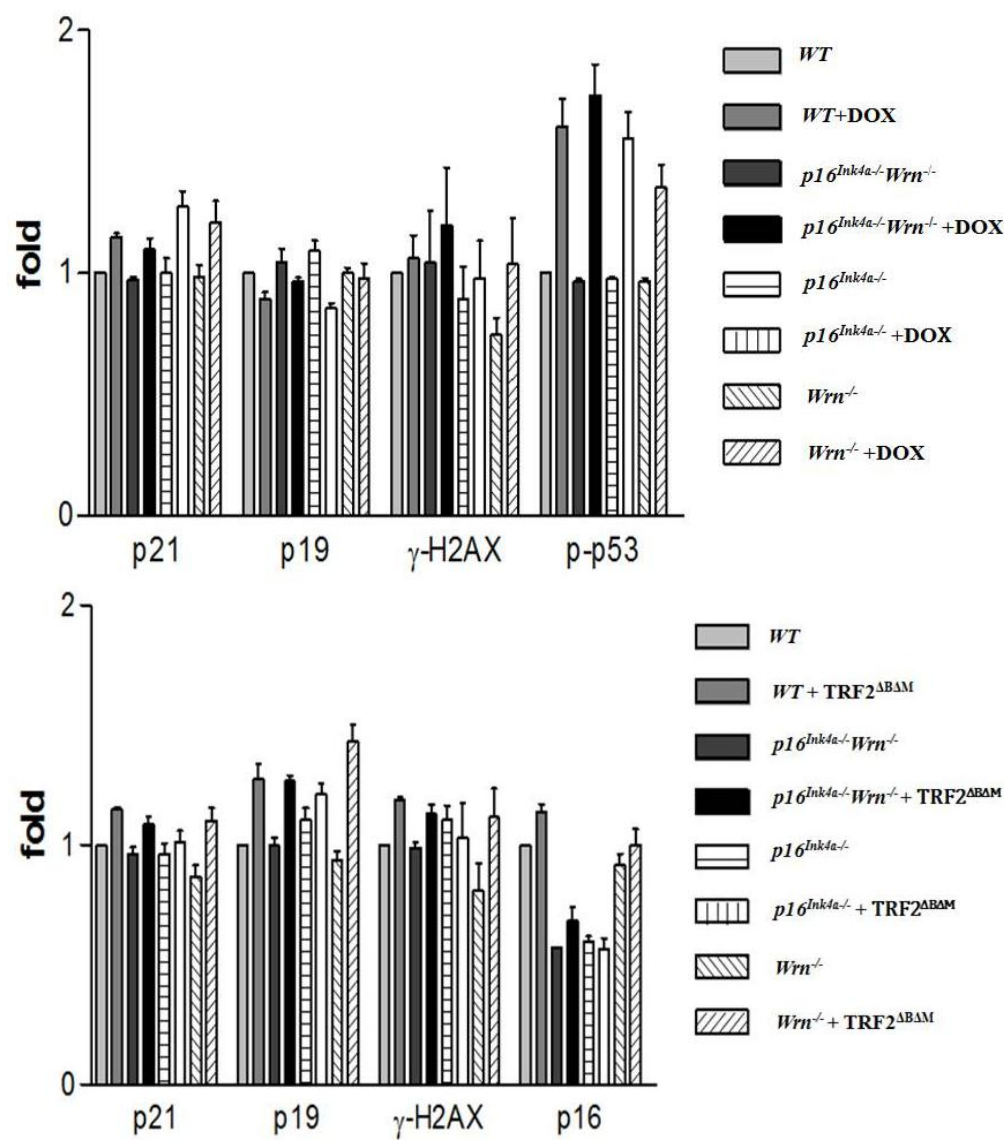

**Figure S2.** The quantification of Figure 4B. The blots were quantified based on their loading control tubulin or actin. The density of blots for WT cells were set as 1.

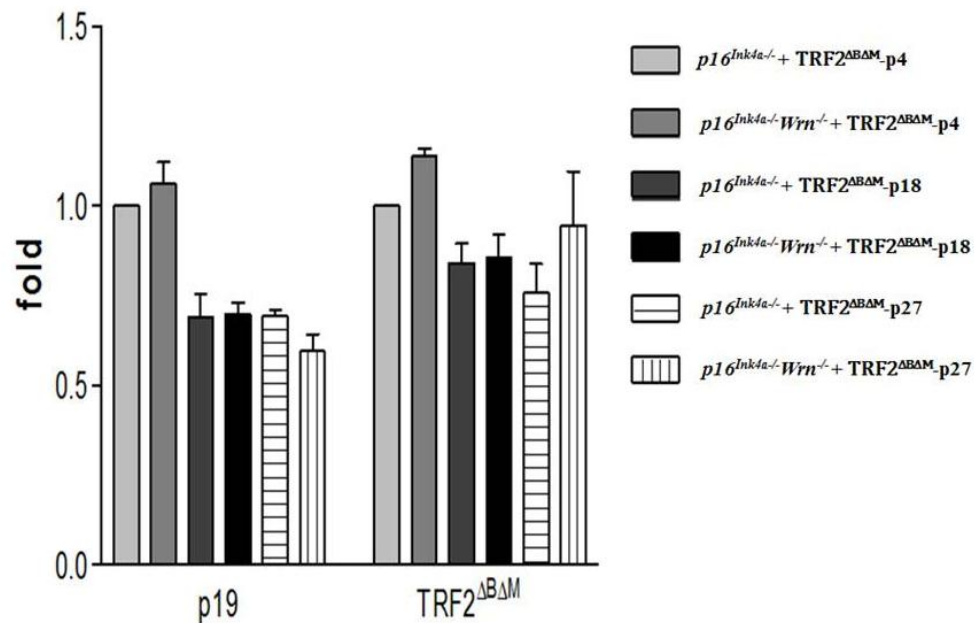

Supplement: Supplementary file 1 [file ijms-13-05866-s001.pdf]
